# Supplementary material for: Vacuum Impregnation, Ohmic Heating, and Drying Processes on Pear Slices Impregnated With Blueberry Juice: Phenolics, Antioxidant, and Color Characteristics
Source: Preprints.org preprint supplement (doi:10.20944/preprints202306.1293.v1), 2023-06-19

**Figure S1.** Pear slices after (a) vacuum impregnation (VI) with blueberry juice at 50 mbar for 5 min; (b) VI followed by ohmic heating (OH) at 50 °C for 90 min; (c) VI-OH followed by air-drying at 40 °C; (d) VI-OH followed by air-drying at 50 °C; (e) VI-OH followed by air-drying at 60 °C; (f) VI-OH followed by freeze-drying; (g) air-drying at 40 °C; (h) air-drying at 50 °C; (i) air-drying at 60 °C; (j) freeze-drying.


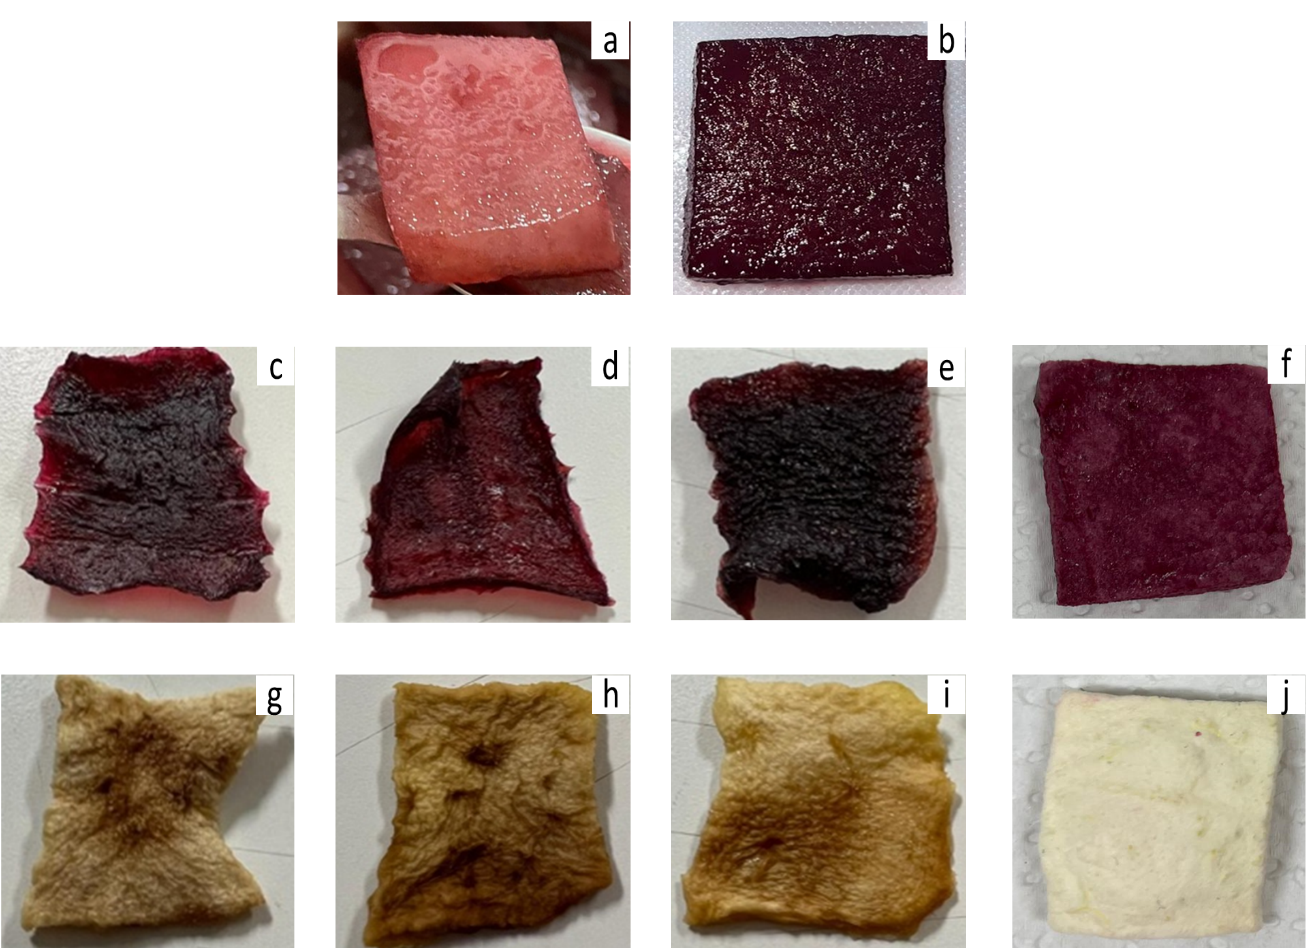

Supplement: Supplementary file 1 [file supplementary]
